# Supplementary material for: Visual sensitivities tuned by heterochronic shifts in opsin gene expression
Source: Springer Nature journal article supplement (doi:10.1186/1741-7007-6-22), 2008-05-23

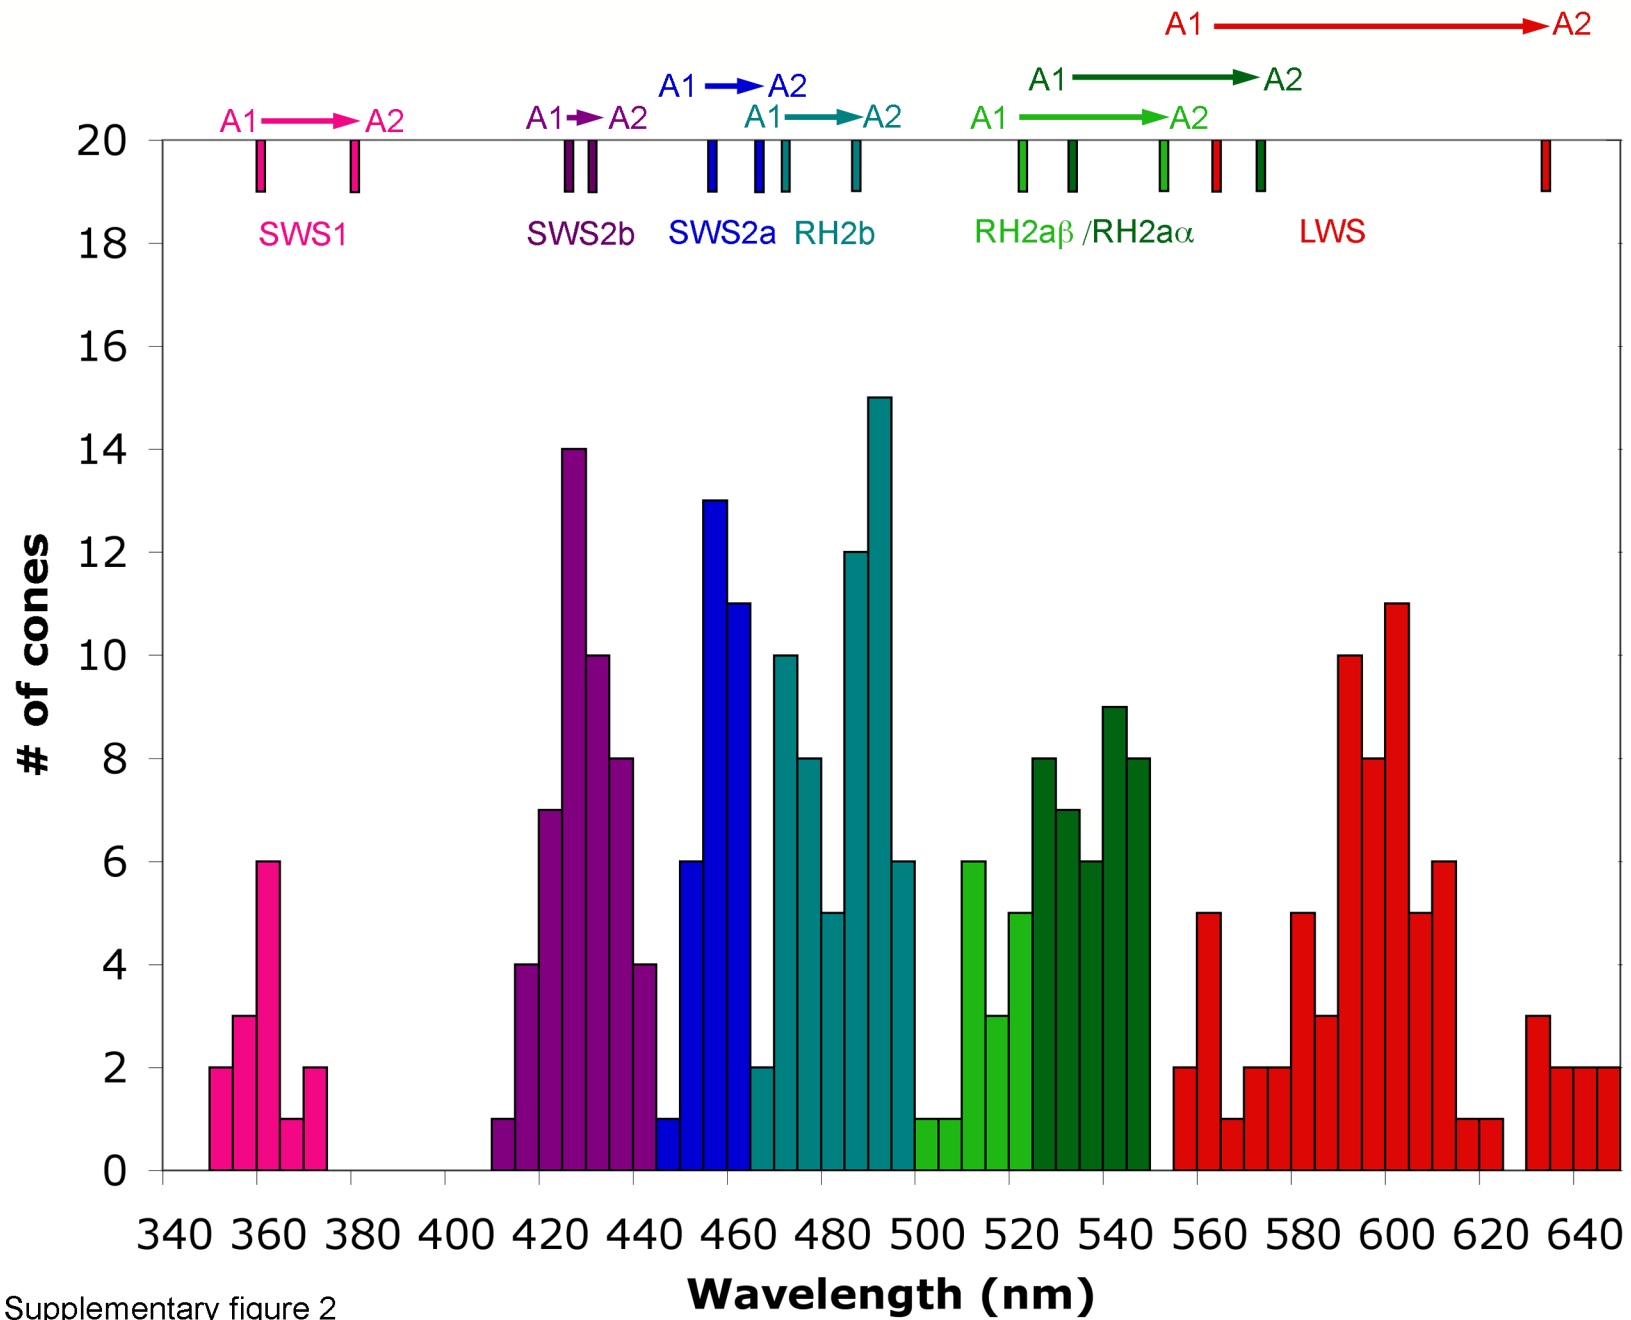

Supplement: Additional file 2 [file 1741-7007-6-22-s2.pdf]
